# Supplementary material for: Magnetically driven hierarchically ordered carbonyl iron@SiO2/Ni@Ag/silicone rubber composite film for enhanced electromagnetic interference shielding with ultralow reflection
Source: Royal Society of Chemistry journal article supplement (doi:10.1039/d3tc00626c), 2023-01-01
Supplement: d3tc00626c1.pdf [file d3tc00626c1.pdf]

## **Supplementary information**

# **Magnetically driven hierarchically ordered carbonyl iron@SiO<sub>2</sub>/Ni@Ag/silicone rubber composite film for enhanced electromagnetic interference shielding with ultralow reflection**

**Teng Chen, Jun Cai, De Gong<sup>\*</sup>, Xiang Cheng, Peng Liu, Deyuan Zhang**

*School of Mechanical Engineering and Automation, Beihang University, Beijing,  
100191, China*

<sup>\*</sup> Corresponding author.  
*E-mail address:* gongde@buaa.edu.cn (for D. Gong).

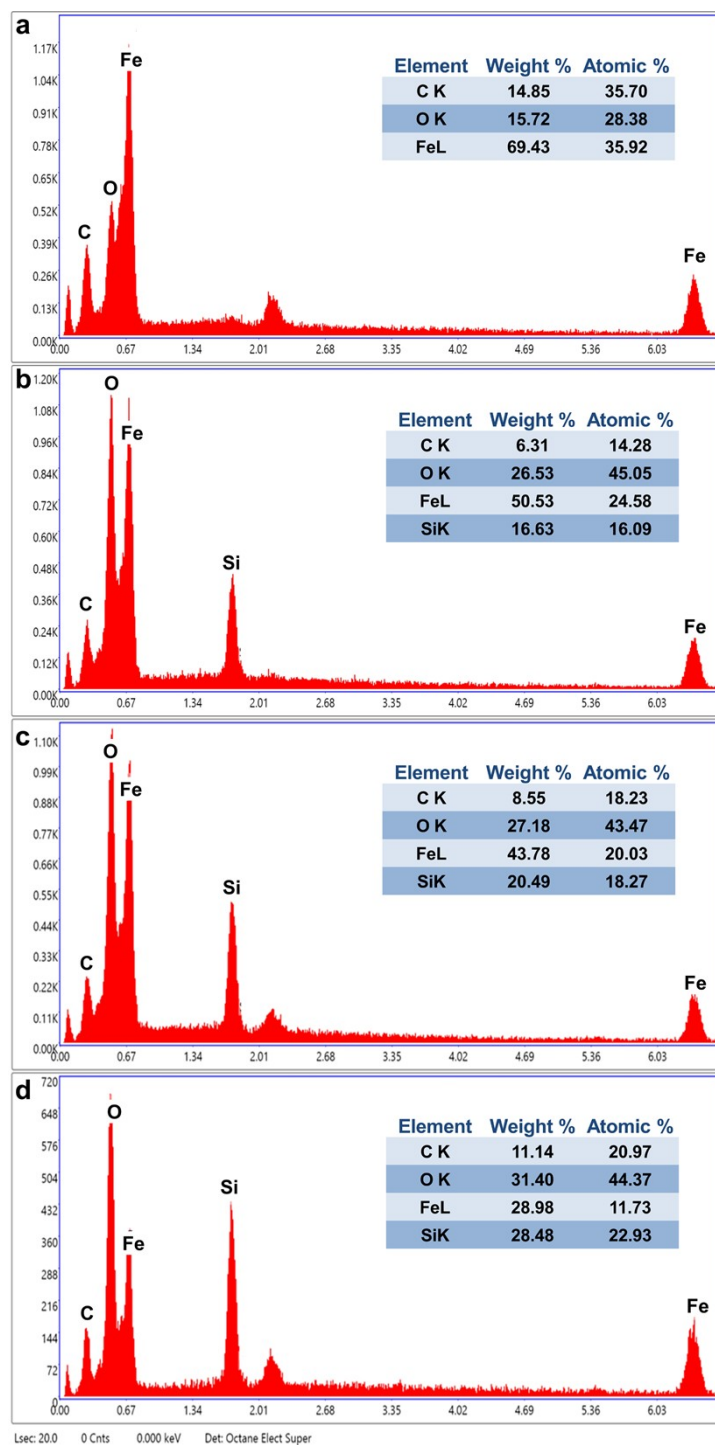

Fig. S1 EDS and the elemental contents of (a) CI, (b) CS-2, (c) CS-3, and (d) CS-5.

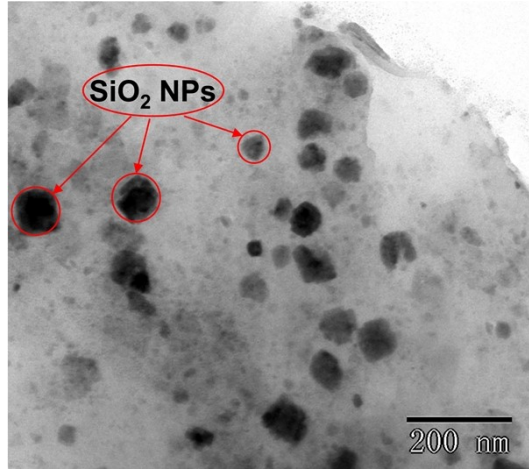

Fig. S2 TEM image of the CS-3 microparticles.

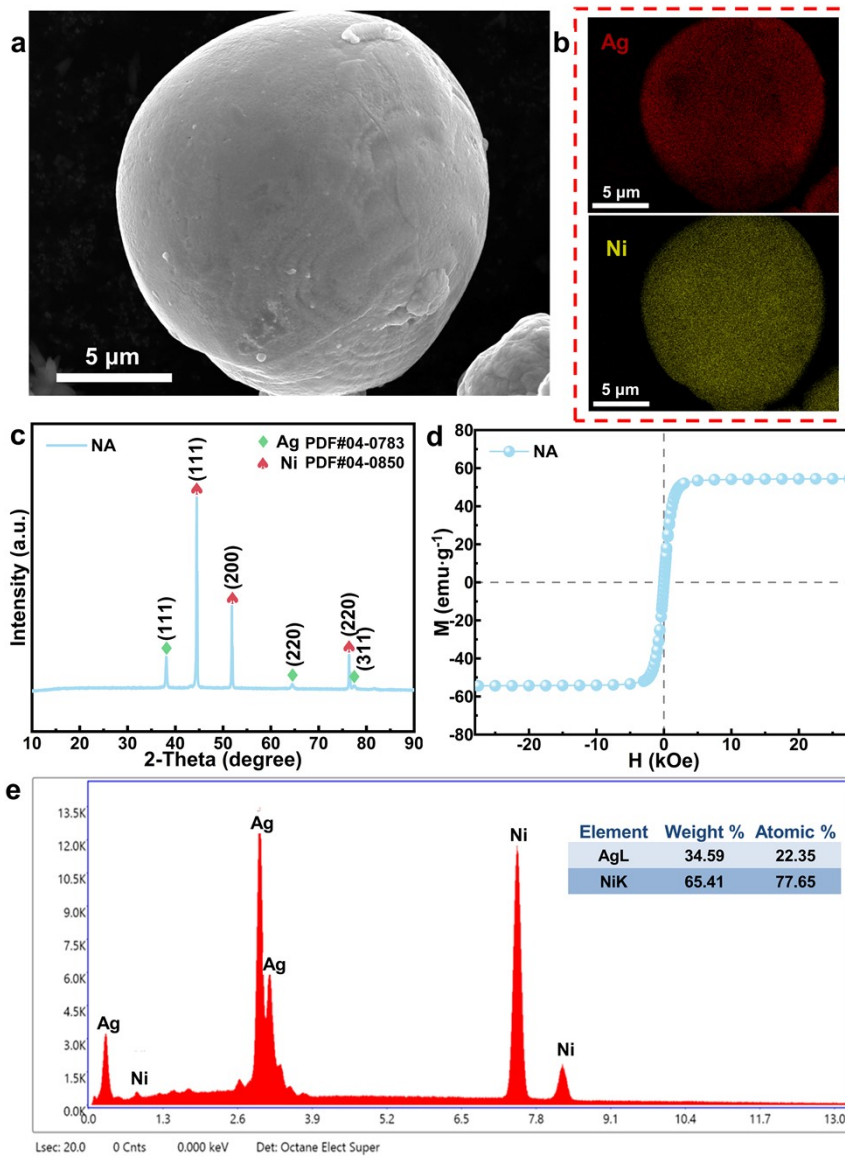

Fig. S3 (a) SEM, (b) EDS, (c) XRD, (d) VSM, and (e) EDS of NA microparticles.

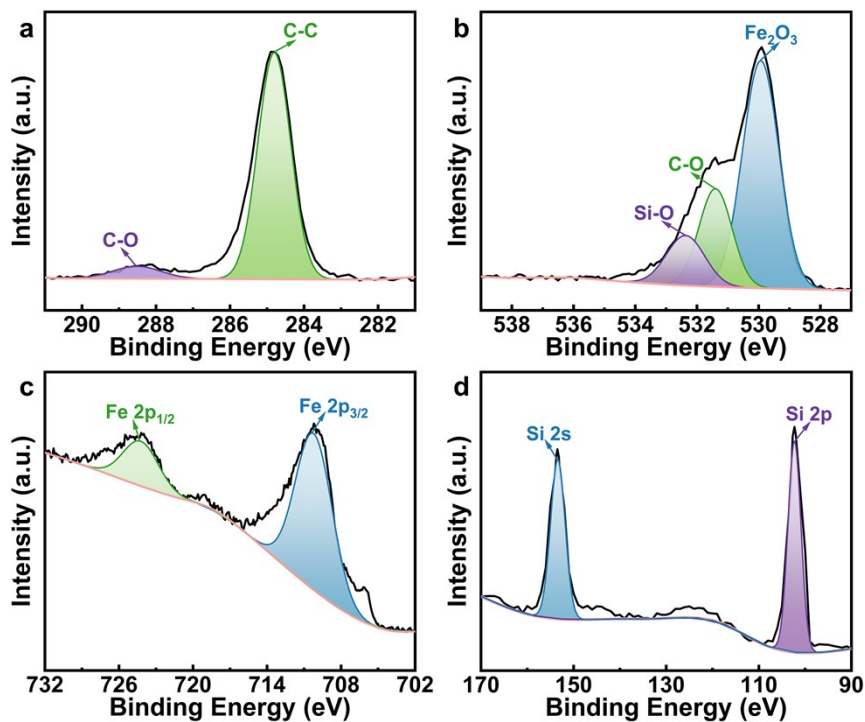

Fig. S4 High-resolution XPS spectra of (a) C 1s, (b) O 1s, (c) Fe 2p, and (d) Si of CS-3 microparticles.

Table S1. The chemical bond percentage calculated from the high-resolution XPS deconvolution results of CS-3 microparticles.

| Spectra | Chemical bonds                 | Percentage (%) |
|---------|--------------------------------|----------------|
| C 1s    | C-C                            | 88.4           |
|         | C-O                            | 11.6           |
| O 1s    | Fe <sub>2</sub> O <sub>3</sub> | 61.6           |
|         | C-O                            | 24.2           |
|         | Si-O                           | 14.2           |
| Si      | Si 2p                          | 54.2           |
|         | Si 2s                          | 45.8           |
| Fe 2p   | Fe 2p <sub>1/2</sub>           | 21.7           |
|         | Fe 2p <sub>3/2</sub>           | 78.3           |

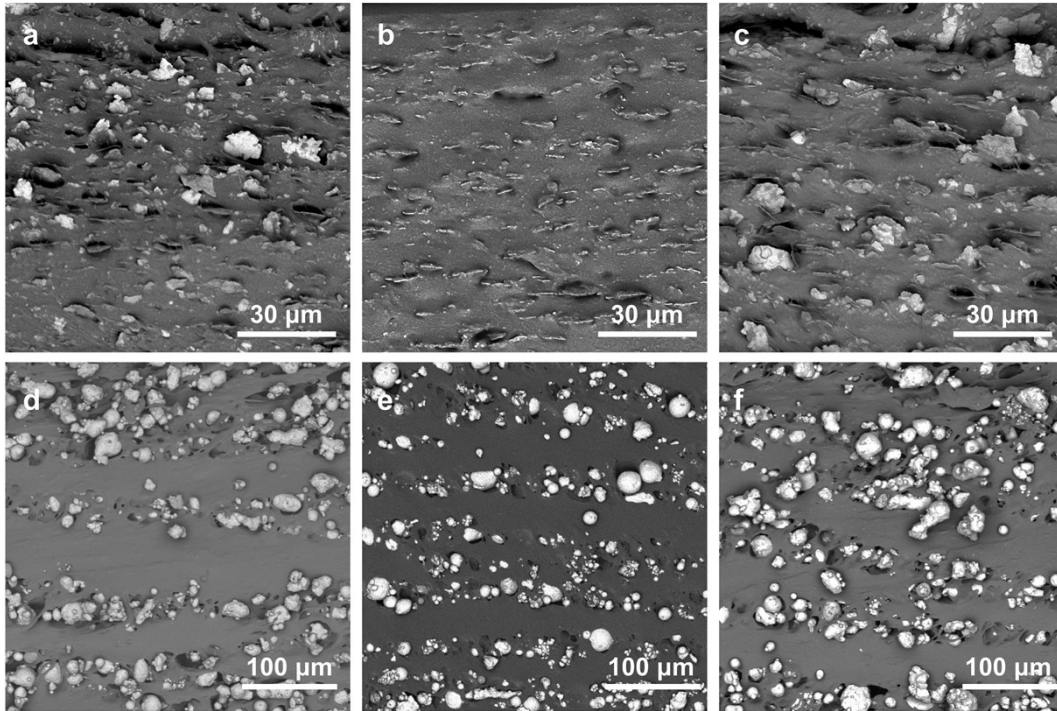

Fig. S5 SEM images of the CS layer (a-c) and NA layer (d-f) aligned under various magnetic field intensities and rotating platform speeds: (a) intensity = 250 mT, speed = 2.0 Hz; (b) intensity = 250 mT, speed = 2.5 Hz; (c) intensity = 200 mT, speed = 2.5 Hz; (d) intensity = 250 mT, speed = 1.25 Hz; (d) intensity = 250 mT, speed = 0.75 Hz, and (d) intensity = 200 mT, speed = 0.75 Hz.

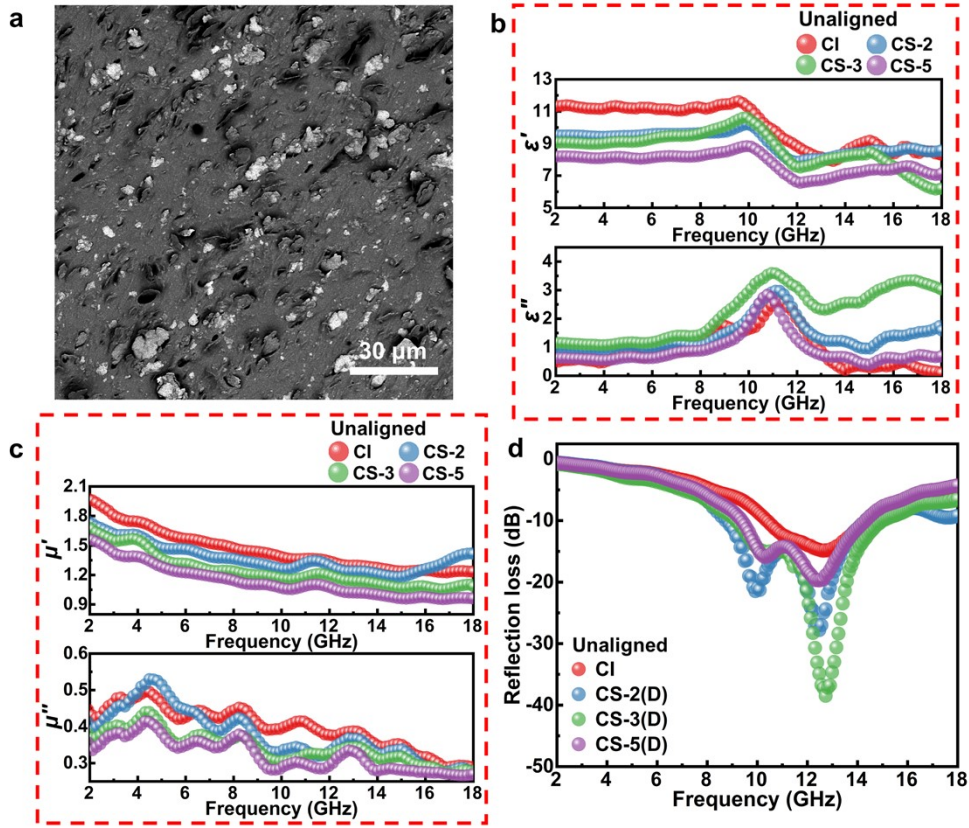

Fig. S6 (a) Cross-sectional SEM image of the unaligned CS layer, (b-c) EM parameters ( $\epsilon'$ ,  $\epsilon''$ ,  $\mu'$ ,  $\mu''$ ) and (d) RL curves of the unaligned CI and CS samples.

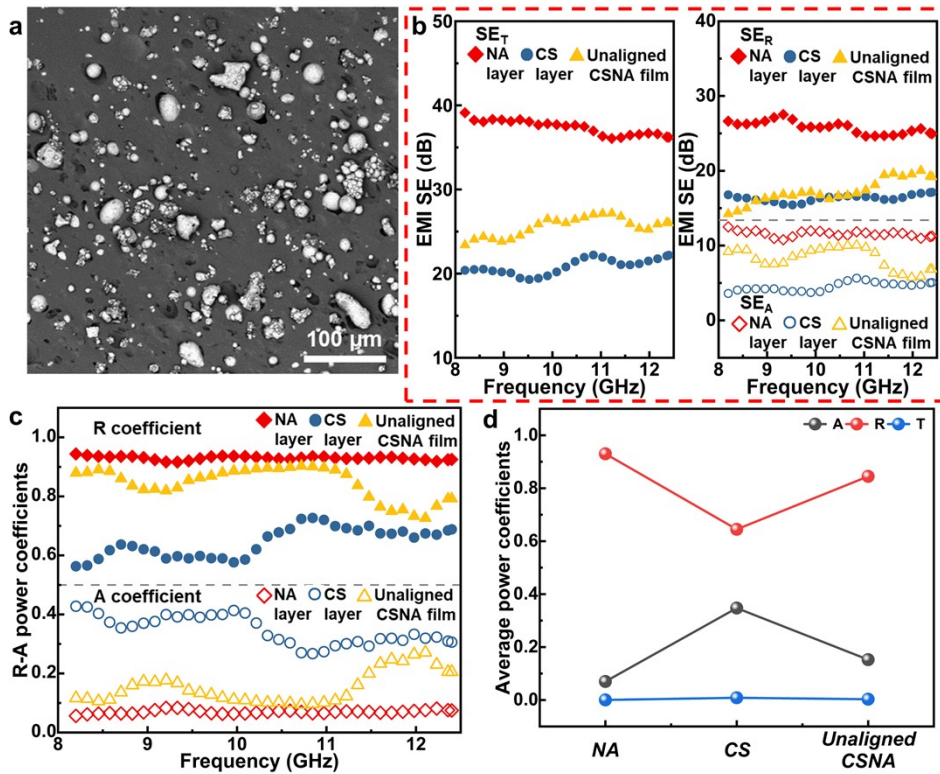

Fig. S7 (a) Cross-sectional SEM image of the unaligned NA layer, (b)  $SE_T$ ,  $SE_R$  and  $SE_A$ , (c) R, A, and (d) average power coefficients of CS layer, NA layer, and

unaligned CSNA film.

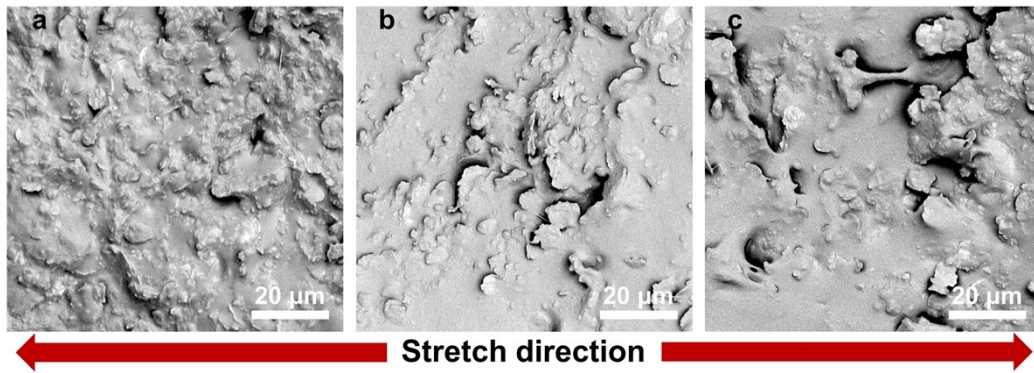

Fig. S8 (a) SEM images of CS layer of the CSNA composite film at different strains of (a) 0 %, (b) 50 %, and (c) 100%.
